# Supplementary material for: Hypertrophic Cardiomyopathy in Underrepresented Populations: Clinical and Genetic Landscape Based on a Russian Single-Center Cohort Study
Source: MDPI journal article supplement (doi:10.3390/genes14112042), 2023-11-04
Supplement: s1 [file s1]

**Table S1.** Clinical characteristics of Russian HCM patients with genetic findings (G+ patients are coloured in grey)

| ID*             | Sex | Age at evaluation (year) | Genotype |                                      |                                       | Age at initial diagnosis (year) | LVH pattern / max LVWT (mm) | LVOTO | Distinct features             | Outcomes                      |
|-----------------|-----|--------------------------|----------|--------------------------------------|---------------------------------------|---------------------------------|-----------------------------|-------|-------------------------------|-------------------------------|
|                 |     |                          | Gene     | Variant**                            | Variant classification (→ reassessed) |                                 |                             |       |                               |                               |
| MYBPC3 CARRIERS |     |                          |          |                                      |                                       |                                 |                             |       |                               |                               |
| 1S              | M   | 58                       | MYBPC3   | NM_000256.3:c.971del:p.I324Tfs*26    | P/LP                                  | 58                              | AS / 19                     | No    | Severe AH                     | No                            |
| 2S              | F   | 36                       | MYBPC3   | NM_000256.3:c.927-9G>A               | P/LP                                  | 36                              | AS / 23                     | Yes   | Asymptomatic                  | AF, embolic stroke, ICD       |
| 5B              | F   | 61                       | MYBPC3   | NM_000256.3:c.1273C>T;p.Q425*        | P/LP                                  | 43                              | AS / 16                     | Yes   | VT, conduction abnormalities  | Hypokinetic HCM, AF, ICD      |
| 7S              | F   | 29                       | MYBPC3   | NM_000256.3:c.1351+2T>C              | P/LP                                  | 26                              | AS / 16                     | Yes   | Elite athlete                 | No                            |
| 8S              | F   | 45                       | MYBPC3   | NM_000256.3:c.3697C>T;p.Q1233*       | P/LP                                  | 36                              | AS / 15                     | Yes   | Mild symptomatic 3 deliveries | Myectomy at 51                |
| 9E              | M   | 34                       | MYBPC3   | NM_000256.3:c.3697C>T;p.Q1233*       | P/LP                                  | 34                              | AS / 17                     | No    | Asymptomatic                  | No                            |
| 12A             | F   | 62                       | MYBPC3   | NM_000256.3:c.2441_2443del:p.K814del | P/LP                                  | 45                              | AS / 24                     | Yes   | SVA, severe AH                | No                            |
| 14H             | F   | 34                       | MYBPC3   | NM_000256.3:c.3697C>T;p.Q1233*       | P/LP                                  | 23                              | AS / 18                     | Yes   | VT, multiple SCD in family    | Myectomy at 26, ICD at 34, AF |

|                               |   |    |        |                                                       |            |    |            |     |                             |                |
|-------------------------------|---|----|--------|-------------------------------------------------------|------------|----|------------|-----|-----------------------------|----------------|
| 17K                           | F | 65 | MYBPC3 | NM_000256.3:c.1120C>T:p.Q374*                         | P/LP       | 64 | Ap / 20    | No  | CAD, SVA                    | AF, syncope    |
| 20K <sup>1</sup>              | M | 61 | MYBPC3 | NM_000256.3:c.624G>C:p.Q208H                          | VUS→VUS    | 60 | Ap-AS / 20 | Yes | Syncope                     | Myectomy at 67 |
| 26K                           | M | 46 | MYBPC3 | NM_000256.3:c.2738-1G>A                               | P/LP       | 34 | Ap / 26    | No  | Asymptomatic, VT            | No             |
| 31S                           | M | 33 | MYBPC3 | NM_000256.3:c.966G>A:p.W322*                          | P/LP       | 21 | AS / 23    | Yes | NYHA II, angina             | No             |
| 32T                           | M | 67 | MYBPC3 | NM_000256.3:c.3811C>T:p.R1271*                        | P/LP       | 47 | AS / 21    | No  | VT, VEx, Cond abnormalities | Alive          |
| 33E                           | M | 38 | MYBPC3 | NM_000256.3: c.3407_3409del:p.Y1136del                | P/LP       | 38 | AS / 20    | Yes | NC, asymptomatic            | No             |
| 37G                           | M | 45 | MYBPC3 | NM_000256.3:c.3697C>T:p.Q1233*                        | P/LP       | 44 | AS / 39    | Yes | NYHA II, SVA                | No             |
| 41D <sup>2</sup>              | F | 44 | MYBPC3 | <b>NM_000256.3: c.2781_2782insCACA: p.S928Hfs*124</b> | P/LP       | 37 | AS / 23    | Yes | NYHA III                    | Myectomy at 46 |
| 41Da <sup>2</sup><br>Sib-twin | M | 44 | MYBPC3 | NM_000256.3: c.2781_2782insCACA: p.S928Hfs*124        | P/LP       | 44 | AS / 16    | No  | II NYHA                     | No             |
| 42P                           | M | 34 | MYBPC3 | NM_000256.3:c.1037G>A:p.R346H                         | VUS→VUS-LP | 21 | Ap / 26    | No  | Asymptomatic                | No             |
| 42Pa<br>Father                | M | 60 | MYBPC3 | NM_000256.3:c.1037G>A:p.R346H                         | VUS→VUS-LP | 27 | Ap / 21    | No  | NYHA II                     | No             |
| 51K                           | M | 35 | MYBPC3 | NM_000256.3:c.3697C>T:p.Q1233*                        | P/LP       | 16 | AS / 26    | No  | VEx, VT                     | ICD at 37      |

|                  |   |    |        |                                 |          |    |         |     |                                    |                        |
|------------------|---|----|--------|---------------------------------|----------|----|---------|-----|------------------------------------|------------------------|
| 51Ka<br>Sib      | M | 38 | MYBPC3 | NM_000256.3:c.3697C>T:p.Q1233*  | P/LP     | 17 | AS / 21 | No  | SVA                                | ICD at 39, AF          |
| 60L              | F | 62 | MYBPC3 | NM_000256.3:c.2429G>A:p.R810H   | P/LP     | 61 | AS / 24 | No  | NYHA III,<br>Cond<br>abnormalities | Hypokinetic<br>HCM, AF |
| 65K              | M | 60 | MYBPC3 | NM_000256.3:c.1731G>A:p.W577*   | P/LP     | 47 | AS / 23 | Yes | VT, 1 <sup>st</sup> AV-<br>block   | Myectomy at 60         |
| 70L              | M | 51 | MYBPC3 | NM_000256.3:c.3697C>T:p.Q1233*  | P/LP     | 45 | AS / 25 | Yes | Syncope,<br>NYHA II                | No                     |
| 75M <sup>2</sup> | F | 29 | MYBPC3 | NM_000256.3:c.3697C>T:p.Q1233*  | P/LP     | 17 | AS / 26 | No  | NYHA II                            | No                     |
| MYH7 CARRIERS    |   |    |        |                                 |          |    |         |     |                                    |                        |
| 11L              | F | 56 | MYH7   | NM_000257.4:c.5135G>A:p.R1712Q  | P/LP     | 51 | AS / 25 | No  | NYHA II, Cond<br>abnormalities     | No                     |
| 18L              | M | 54 | MYH7   | NM_000257.4:c.2185G>C:p.A729P   | P/LP     | 36 | AS / 18 | No  | Angina, VT                         | No                     |
| 23B              | M | 36 | MYH7   | NM_000257.4:c.2276G>A:p.G759D   | VUS→P/LP | 24 | Ap / 18 | No  | NC                                 | No                     |
| 24H              | M | 36 | MYH7   | NM_000257.4:c.2129C>T:p.P710L   | P/LP     | 24 | AS / 17 | Yes | Asymptomatic,<br>VT                | No                     |
| 34P              | F | 45 | MYH7   | NM_000257.4:c.2185G>C:p.A729P   | P/LP     | 40 | AS / 18 | No  | Asymptomatic                       | No                     |
| 35N              | M | 52 | MYH7   | NM_000257.4: c.5134C>T:p.R1712W | P/LP     | 47 | AS / 18 | Yes | Syncope,<br>NYHA III               | Myectomy at<br>56, AF  |
| 36S              | F | 64 | MYH7   | NM_000257.4:c.3569C>T:p.A1190V  | P/LP     | 62 | Ap / 24 | No  | Angina, SVA                        | No                     |

|                               |   |    |      |                                          |            |    |               |     |                                              |                                      |
|-------------------------------|---|----|------|------------------------------------------|------------|----|---------------|-----|----------------------------------------------|--------------------------------------|
| 43S                           | F | 62 | MYH7 | NM_000257.4:c.1615A>G;p.M539V            | P/LP       | 42 | / 16          | No  | NYHA III,<br>Sinus arrest,<br>restrictive DD | Hypokinetic<br>HCM, AF,<br>Pacemaker |
| 44S                           | F | 60 | MYH7 | NM_000257.4:c.3652G>C;p.E1218Q           | P/LP       | 57 | AS / 19       | Yes | NYHA III,<br>Cond<br>abnormalities           | Myectomy at<br>62, AF,<br>pacemaker  |
| 45F                           | F | 67 | MYH7 | NM_000257.4:c.1711G>A;p.G571R            | VUS→P/LP   | 66 | SC / 22       | Yes | NYHA III,<br>severe AH                       | Myectomy at<br>67, AF                |
| 46S                           | M | 36 | MYH7 | NM_000257.4:c.632C>T;p.P211L             | P/LP       | 33 | AS / 23       | Yes | Asymptomatic                                 | No                                   |
| 48R <sup>2</sup>              | M | 52 | MYH7 | NM_000257.4:c.746G>A;p.R249Q             | P/LP       | 32 | AS / 22       | No  | NYHA II, SVA                                 | AF                                   |
| 48Ra <sup>2</sup><br>Daughter | F | 21 | MYH7 | NM_000257.4:c.746G>A;p.R249Q             | P/LP       | 8  | AS / 28       | No  | NYHA II<br>Delivery                          | No                                   |
| 53M                           | F | 54 | MYH7 | <b>NM_000257.4:c.4163A&gt;G;p.E1388G</b> | VUS→VUS-LP | 54 | AS / 18       | No  | Severe AH,<br>NYHA II                        | No                                   |
| 72A                           | M | 16 | MYH7 | NM_000257.4:c.2221G>A;p.G741R            | P/LP       | 2  | AS / 23       | Yes | NYHA III                                     | Myectomy at 6                        |
| 72Aa<br>mother                | F | 41 | MYH7 | NM_000257.4:c.2221G>A;p.G741R            | P/LP       | 41 | PM / 13       | No  | Asymptomatic                                 | No                                   |
| 73A <sup>2</sup>              | M | 38 | MYH7 | NM_000257.4:c.2360G>A;p.R787H            | VUS→VUS    | 31 | Ap-AS /<br>43 | No  | NYHA II,<br>angina, SVA,<br>presyncope       | No                                   |
| 76P                           | F | 25 | MYH7 | NM_000257.4:c.1208G>A;p.R403Q            | P/LP       | 15 | AS / 30       | Yes | NYHA II,<br>syncope                          | No                                   |
| 77N                           | F | 44 | MYH7 | NM_000257.4:c.2791G>A;p.E931K            | P/LP       | 13 | AS / 18       | No  | NYHA II, VT,<br>SVA                          | No                                   |
| OTHER SARCOMERE CARRIERS      |   |    |      |                                          |            |    |               |     |                                              |                                      |
| 29S                           | F | 41 | TPM1 | NM_001018005.2:c.629A>G;p.Q210R          | P/LP       | 29 | AS / 17       | No  | Mild<br>hydropericardi                       | No                                   |

|                  |   |    |       |                                         |            |    |                  |     |                                                   |                      |
|------------------|---|----|-------|-----------------------------------------|------------|----|------------------|-----|---------------------------------------------------|----------------------|
|                  |   |    |       |                                         |            |    |                  |     | um, VT<br>asymptomatic                            |                      |
| 30K              | F | 57 | TPM1  | NM_001018005.2:c.629A>G:p.Q210R         | P/LP       | 44 | Meso /<br>22     | Yes | 1 <sup>st</sup> AV-block                          | No                   |
| 30Kasib          | F | 49 | TPM1  | NM_001018005.2:c.629A>G:p.Q210R         | P/LP       | 49 | AS / 13          | No  | Asymptomatic                                      | No                   |
| 39S              | M | 68 | TPM1  | NM_001018005.2:c.629A>G:p.Q210R         | P/LP       | 68 | AS / 19          | No  | Asymptomatic                                      | No                   |
| 39Sadaughter     | F | 38 | TPM1  | NM_001018005.2:c.629A>G:p.Q210R         | P/LP       | 37 | AS / 13          | No  | NYHA II, mild<br>hydropericardium                 | No                   |
| 63A              | M | 48 | TPM1  | <b>NM_001018005.2:c.86A&gt;G:p.K29R</b> | VUS→VUS-LP | 42 | AS / 25          | No  | Asymptomatic                                      | No                   |
| 66C              | F | 32 | TPM1  | NM_001018005.2:c.574G>A:p. p.E192K      | P/LP       | 32 | AS / 20          | No  | Asymptomatic,<br>SVT                              | No                   |
| 21U              | F | 56 | TNNT2 | NM_001276345.2:c.341C>T:p.A114V         | P/LP       | 48 | AS / 20          | Yes | NYHA II, Cond<br>abnormalities,<br>angina         | No                   |
| 25C              | M | 67 | TNNT2 | NM_001276345.2:c.862C>T:p.R288C         | P/LP       | 67 | AS / 27          | Yes | Mild Ao<br>stenosis                               | Stroke at 66         |
| 6E               | F | 50 | TNNI3 | NM_000363.5:c.557G>A:p.R186Q            | P/LP       | 36 | Meso /<br>18     | No  | RV obstruction                                    | AF, SVA,<br>NYHA III |
| 56H <sup>3</sup> | M | 25 | TNNI3 | NM_000363.5:c.422G>A:p.R140Q            | P/LP       | 25 | Ap / 17          | No  | Asymptomatic                                      | No                   |
| 10G              | F | 28 | MYL2  | NM_000432.4:c.275-8C>A                  | VUS→LP     | 5  | Bi, Meso<br>/ 23 | Yes | Restrictive DD,<br>NYHA II, Cond<br>abnormalities | AF, ICD at 36        |
| 22S              | F | 44 | MYL2  | NM_000432.4:c.353+7G>A                  | VUS→VUS    | 28 | AS / 25          | No  | SVA, VT                                           | ICD at 44            |

| NON-SARCOMERE CARRIERS |   |    |       |                                                            |            |    |              |     |                                                  |                                      |
|------------------------|---|----|-------|------------------------------------------------------------|------------|----|--------------|-----|--------------------------------------------------|--------------------------------------|
| 38V                    | M | 38 | ALPK3 | NM_020778.5:c.4689delG;p.W1563*                            | P/LP       | 34 | SC / 32      | Yes | Severe AH, VT                                    | Myectomy at 38                       |
| 38Va<br>Father         | M | 62 | ALPK3 | NM_020778.5:c.4689delG;p.W1563*                            | P/LP       | 62 | AS / 28      | Yes | Severe AH,<br>Asymptomatic                       | No                                   |
| 38Vb<br>Sib            | F | 36 | ALPK3 | NM_020778.5:c.4689delG;p.W1563*                            | P/LP       | 36 | AS / 13      | No  | Asymptomatic                                     | No                                   |
| 4Ga<br>son             | M | 42 | FLNC  | NM_001458.5:c.5500C>T;p.H1834Y                             | VUS→VUS-LP | 42 | AS / 13      | No  | Asymptomatic                                     | No                                   |
| 28M <sup>2</sup>       | F | 71 | FLNC  | NM_001458.5:c.5945G>A;p.R1982H                             | VUS→VUS-LP | 71 | Ap / 20      | No  | NYHA III, VEx                                    | No                                   |
| 55M                    | M | 67 | FLNC  | NM_001458.5:c.2635C>T;p.R879C                              | VUS→VUS-LB | 67 | AS / 20      | Yes | CAD, NYHA II                                     | AF                                   |
| 16N                    | M | 77 | FHOD3 | NM_001281740.3:c.4375C>T;p.R1459W                          | VUS→VUS-LB | 40 | AS / 9       | No  | VT, LVEF 35%                                     | Hypokinetic<br>HCM, death<br>from HF |
| 61L                    | M | 41 | FHOD3 | <b>NM_001281740.3:c.2429G&gt;A;p.G810E</b>                 | VUS→VUS    | 41 | Ap / 16      | No  | Asymptomatic,<br>Cond<br>abnormalities           | No                                   |
| 69R                    | F | 51 | TCAP  | NM_003673.4:c.448G>A;p.G150S                               | VUS→VUS    | 51 | AS / 16      | No  | Myalgia, CK<br>elevation,<br>angina, NYHA<br>III | No                                   |
| 74A <sup>2</sup>       | M | 42 | BAG3  | <b>NM_004281.4:c.656C&gt;T;p.P219L</b>                     | VUS→VUS    | 41 | Ap-A /<br>24 | No  | Angina                                           | No                                   |
| 49D                    | M | 66 | GAA   | NM_000152.5:c.2237G>C;p.W746S                              | VUS→VUS    | 64 | Meso /<br>23 | No  | NYHA II, VEx,<br>SVA, midvent<br>obstruction     | No                                   |
| 59D                    | M | 69 | LAMP2 | <b>NM_002294.3:c.244delG;p.D82Ifs*7</b><br>(Mosaicism 17%) | P/LP       | 69 | AS / 17      | Yes | VT, SVA                                          | No                                   |

|                            |   |    |                  |                                                                            |                          |    |            |     |                              |                                         |
|----------------------------|---|----|------------------|----------------------------------------------------------------------------|--------------------------|----|------------|-----|------------------------------|-----------------------------------------|
|                            |   |    |                  |                                                                            |                          |    |            |     |                              |                                         |
| MULTIPLE VARIANTS CARRIERS |   |    |                  |                                                                            |                          |    |            |     |                              |                                         |
| 15M                        | M | 18 | TRIM63<br>TRIM63 | NM_032588.4:c.739C>T:p.Q247*<br>NM_032588.4:c.224G>A:p.C75Y                | P/LP                     | 15 | AS / 24    | No  | Asymptomatic athlete         | No                                      |
| 3B                         | F | 29 | MYBPC3<br>TNNC1  | NM_000256.3:c.3697C>T:p.Q1233*<br>NM_003280.3:c.86T>A:p.L29Q               | P/LP<br>P/LP             | 22 | AS / 25    | Yes | 3 deliveries, 4 children     | Myectomy at 28, SCD at 42               |
| 4G                         | F | 51 | MYBPC3<br>FLNC   | <b>NM_000256.3:c.3790T&gt;C:p.C1264R</b><br>NM_001458.5:c.5500C>T:p.H1834Y | P/LP<br>VUS→VUS-LP       | 51 | SC / 20    | Yes | Severe AH, SCD of eldest son | Hypokinetic HCM, AF, fatal stroke at 57 |
| 19B                        | F | 33 | MYBPC3<br>FLNC   | NM_000256.3:c.743_746del: p.D248Afs*51<br>NM_001458.5:c.4413A>T: p.Q1471H  | P/LP<br>VUS→VUS-LB       | 19 | Ap-AS / 22 | No  | NYHA II                      | No                                      |
| 27K                        | M | 46 | MYBPC3<br>FLNC   | NM_000256.3:c.2905+1G>A<br>NM_001458.5:c.1609T>G:p.Y537D                   | P/LP<br>VUS→LP           | 34 | AS / 26    | No  | NYHA III                     | AF                                      |
| 47S                        | M | 60 | MYH7<br>FLNC     | NM_000257.4:c.4180G>A:p.A1394T<br>NM_001458.5:c.6214G>A:p.G2072R           | VUS→VUS-LP<br>VUS→VUS-LP | 60 | AS / 18    | No  | Expanded fibrosis (41% LGE)  | AF                                      |
| 50S                        | F | 61 | TPM1<br>MYBPC3   | <b>NM_001018005.2:c.74C&gt;T:p.A25V</b><br>NM_000256.3:c.932C>T: p.S311L   | P/LP<br>VUS→VUS          | 61 | Ap-AS / 14 | No  | Asymptomatic                 | No                                      |
| 50Sa Sib                   | M | 55 | TPM1<br>MYBPC3   | NM_001018005.2:c.74C>T:p.A25V<br>NM_000256.3:c.932C>T: p.S311L             | P/LP<br>VUS→VUS          | 55 | Ap-AS / 15 | No  | NYHA II                      | No                                      |
| 52D <sup>2</sup>           | M | 24 | MYH7<br>FHOD3    | NM_000257.4:c.2156G>A:p.R719Q                                              | P/LP                     | 23 | AS / 15    | No  | NC, LVEF < 65%               | AF, PV ablation                         |

|             |   |    |                  |                                                                          |                          |    |            |     |                                                           |                        |
|-------------|---|----|------------------|--------------------------------------------------------------------------|--------------------------|----|------------|-----|-----------------------------------------------------------|------------------------|
|             |   |    |                  | NM_001281740.3:c.1754C>A:p.S585Y                                         | VUS→VUS-LB               |    |            |     |                                                           |                        |
| 54V         | M | 51 | MYBPC3<br>MYBPC3 | NM_000256.3:c.3794A>T:p.E1265V<br>NM_000256.3:c.3796T>C:p.C1266R         | P/LP<br>P/LP             | 40 | AS / 23    | No  | SVA                                                       | AF                     |
| 62B         | M | 39 | MYBPC3<br>ALPK3  | NM_000256.3:c.1037G>A:p.R346H<br>NM_020778.5:c.3967G>A:p.A1323T          | VUS→VUS-LP<br>VUS→VUS    | 39 | Ap-AS / 17 | No  | Asymptomatic<br>ST elevation                              | No                     |
| 62Ba<br>Sib | M | 33 | MYBPC3<br>ALPK3  | NM_000256.3:c.1037G>A:p.R346H<br>NM_020778.5:c.3967G>A:p.A1323T          | VUS→VUS-LP<br>VUS→VUS    | 30 | AS / 18    | No  | Cond<br>abnormalities<br>ST elevation                     | No                     |
| 64B         | F | 46 | ACTC1<br>FLNC    | NM_005159.5:c.940C>T:p.R314C<br><b>NM_001458.5:c.15C&gt;A p.5S&gt;R</b>  | P/LP<br>VUS-LB           | 46 | AS / 16    | Yes | SVA, Cond<br>abnormalities                                | Alcohol<br>ablation    |
| 67V         | M | 51 | MYBPC3<br>GLA    | NM_000256.3:c.2623C>T:p.H875Y<br>NM_000169.3:c.1060A>G:p.I354V           | VUS→VUS-LP<br>VUS→LB     | 51 | AS / 21    | Yes | SVA                                                       | AF, Myectomy<br>at 51  |
| 68A         | M | 35 | TNNC1<br>MYH7    | NM_003280.3:c.435C>A:p.D145E<br><b>NM_000257.4:c.3627C&gt;G:p.N1209K</b> | P/LP<br>VUS→VUS-LP       | 35 | AS / 16    | Yes | Angina, NYHA<br>II                                        | No                     |
| 71Z         | M | 47 | FLNC<br>FLNC     | NM_001458.5:c.2377G>A:p.E793K<br>NM_001458.5:c.5020G>A:p.G1674S          | VUS→VUS-LB<br>VUS→VUS-LB | 47 | AS / 15    | No  | Angina                                                    | No                     |
| 78K         | F | 42 | MYBPC3<br>MYH7   | NM_000256.3:c.3697C>T:p.Q1233*<br>NM_000257.4:c.5137G>A:p.V1713M         | P/LP<br>VUS→VUS          | 42 | PM / 17    | No  | Palpitations<br>Severe HCM in<br>child (same<br>genotype) | No                     |
| 13S         | M | 40 | MYBPC3           | NM_000256.3:c.3763G>A:p.A1255T                                           | P/LP                     | 39 | AS / 25    | Yes | NC, VT, VEx,<br>SVEx                                      | Death from HF<br>at 44 |



|                  |   |    |                          |                                                                                                              |                                |    |         |     |                             |                    |
|------------------|---|----|--------------------------|--------------------------------------------------------------------------------------------------------------|--------------------------------|----|---------|-----|-----------------------------|--------------------|
|                  |   |    | MYBPC3<br>FLNC           | NM_000256.3:c.538G>A:p.G180S<br>NM_001458.5:c.5500C>T:p.H1834Y                                               | VUS→VUS<br>VUS→VUS-LP          |    |         |     |                             |                    |
| 40R              | M | 29 | MYH7<br>MYH7<br>PTPN11   | <b>NM_000257.4:c.137T&gt;A:p.F46Y</b><br>NM_000257.4:c.5346G>A: p.M1782I<br>NM_001330437.1: c.925A>G:p.I309V | VUS→VUS-LP<br>VUS→LP<br>VUS→LB | 14 | AS / 19 | Yes | NC, Cond<br>abnormalities   | Myectomy at 31     |
| 58M <sup>2</sup> | M | 38 | ALPK3<br>ALPK3<br>MYBPC3 | NM_020778.5:c.1958C>G:p.S653*<br>NM_020778.5:c.3491G>A:p.R1164Q<br>NM_000256.3:c.667G>A:p.E223K              | P/LP<br>VUS→VUS-LP<br>VUS→VUS  | 38 | SC / 16 | No  | Restrictive DD,<br>LVEF 34% | Hypokinetic<br>HCM |

A – anterior; AH – arterial hypertension; Ao – aorta; Ap – apical; AS – asymmetric septal; Bi – biventricular hypertrophy; CK – creatine kinase; Cond – conduction (abnormalities); DD – diastolic dysfunction; ID – identification number of patients in the present study; LGE – late gadolinium enhancement; Meso – mesoventricular; NC – non-compaction myocardium; NYHA - New York Heart Association; PM – papillary muscle; SC – symmetric concentric; Sib – sibling; SVEx – supraventricular extrasystole; SVA – supraventricular arrhythmia; VEx – ventricular extrasystole (> 500/24h); VT – ventricular tachycardia;

\*in order of inclusion in the study

\*\*Novel variants are spelled in bold; All variants are in heterozygosity

<sup>1</sup>Jewish origin; <sup>2</sup>Turkic origin; <sup>3</sup>Armenian origin
